# Supplementary material for: Variants in ELL2 influencing immunoglobulin levels associate with multiple myeloma
Source: PubMed Central journal article supplement (PMC4455110; doi:10.1038/ncomms8213), 2015-05-26
Supplement: ncomms8213-s1.pdf [file ncomms8213-s1.pdf]

# Supplementary Figure 1

**a**

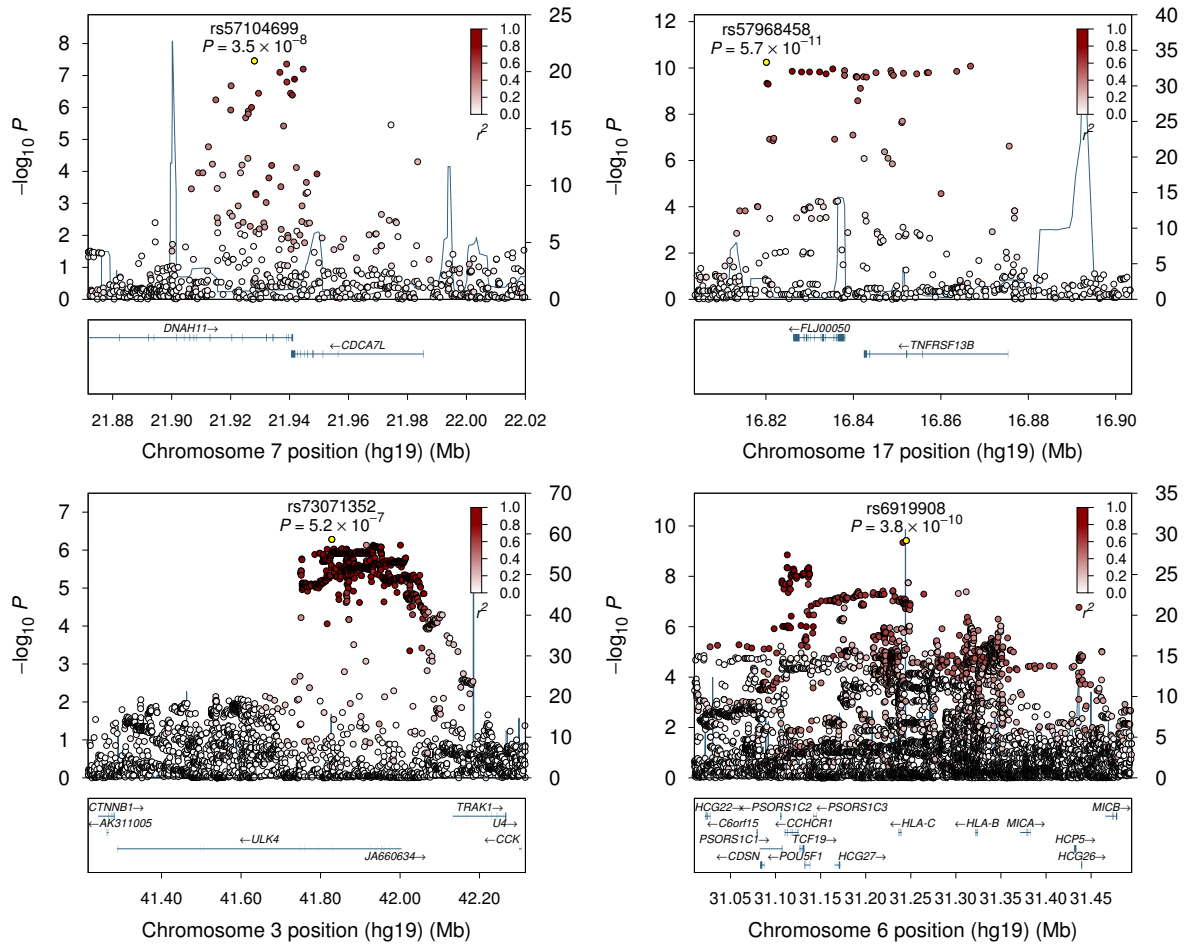

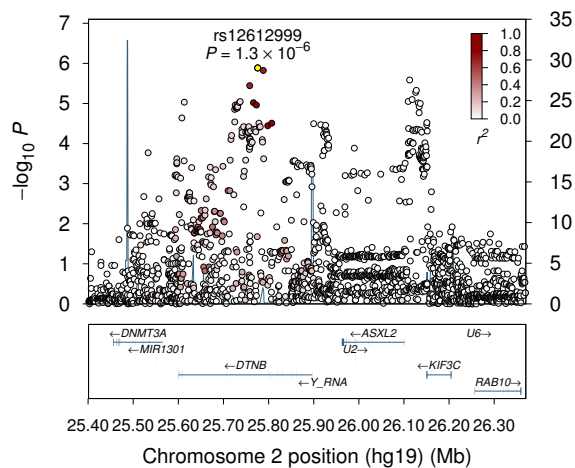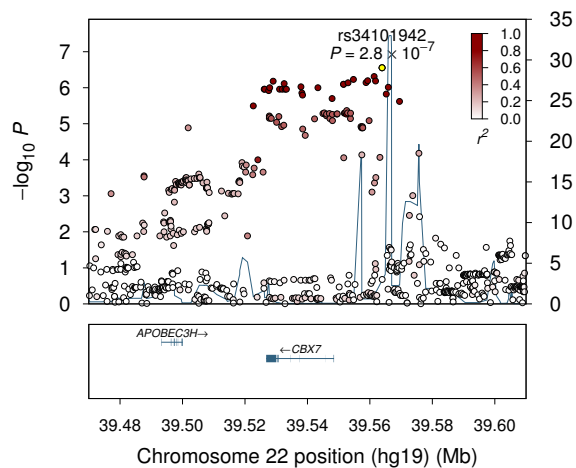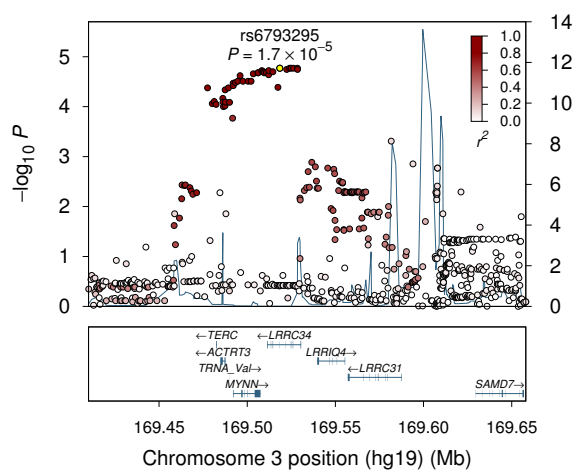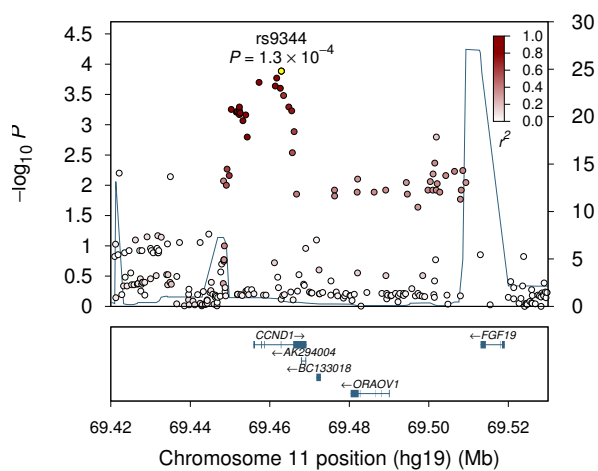

**b**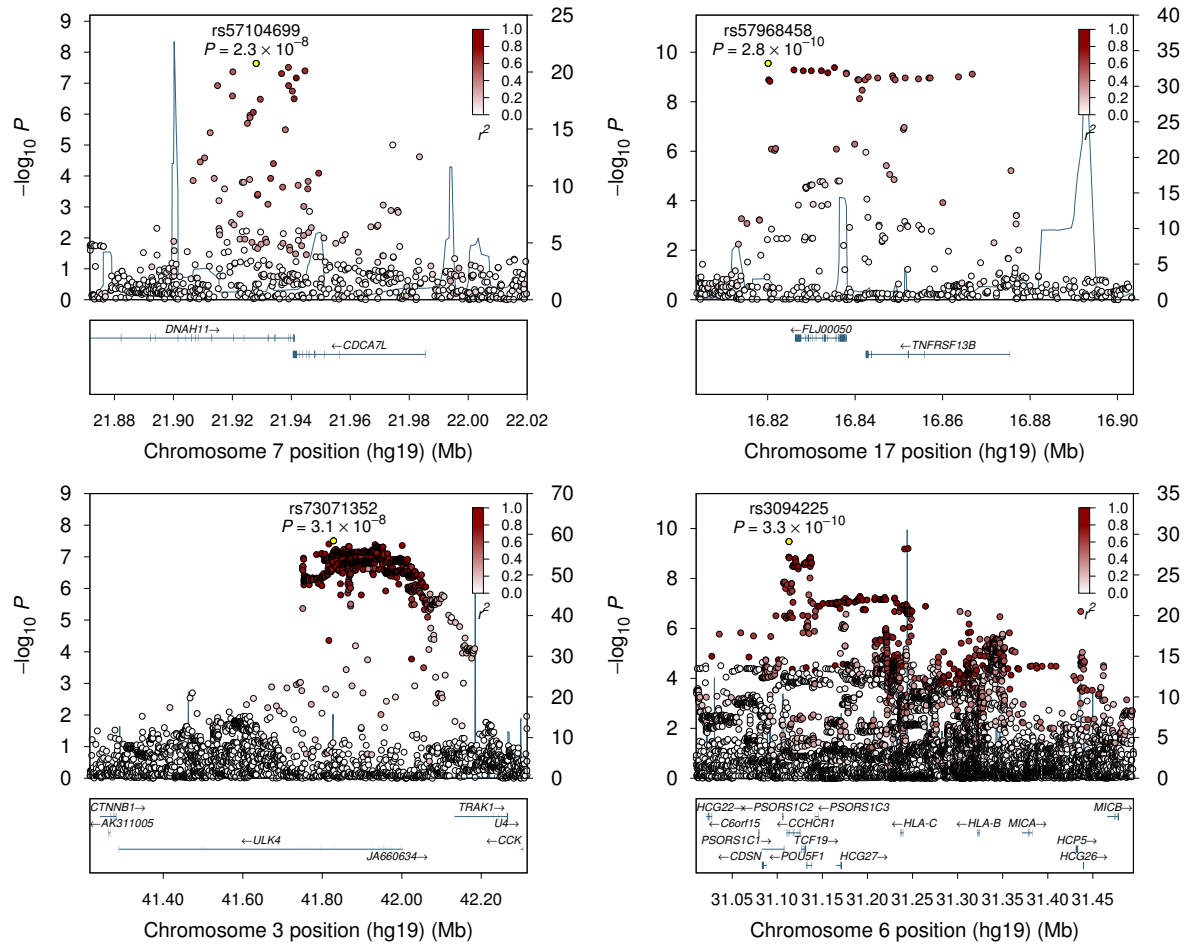

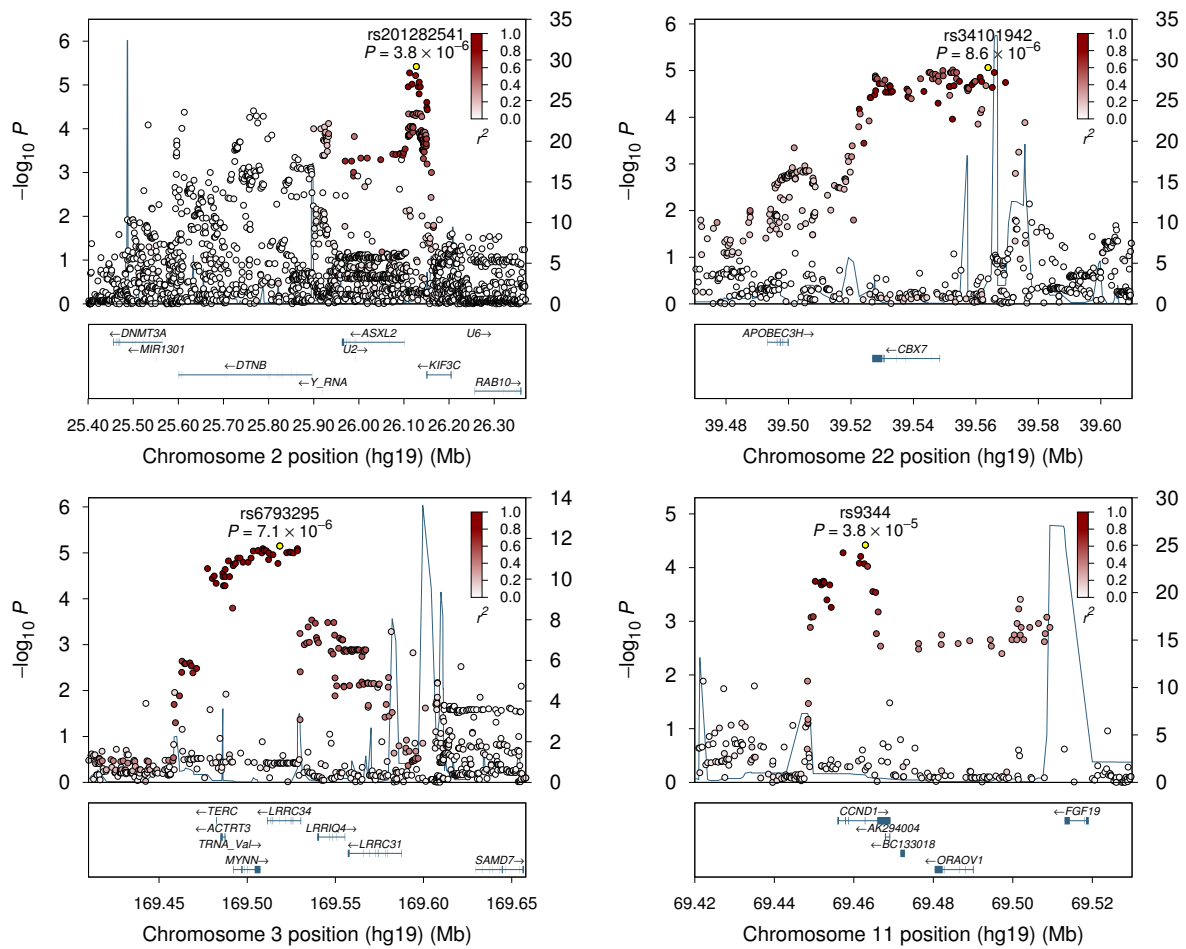

Association plots for MM risk loci identified in previous studies. **(a)** (pages 1 and 2): meta-analysis  $P$  values for the Swedish-Norwegian samples and the Icelandic MM samples. **(b)** (pages 3 and 4): meta-analysis  $P$  values for the Swedish-Norwegian samples and the Icelandic MM+MGUS samples.

## Supplementary Figure 2

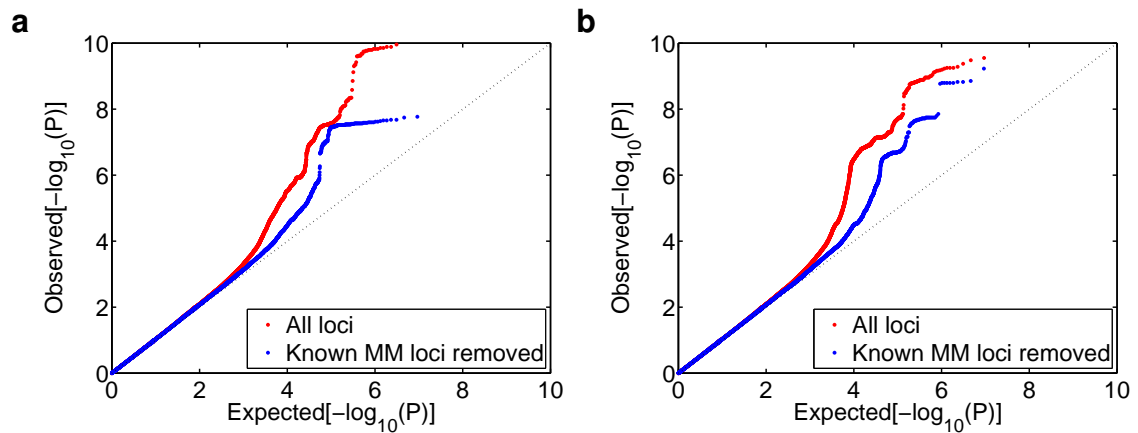

Quantile-quantile plots for the meta-analyses of the discovery sets: **(a)** Results obtained with the Swedish-Norwegian data and the Icelandic MM data; **(b)** Results obtained with the Swedish-Norwegian data and the Icelandic MM+MGUS data. A total of 12.1 million SNPs were used in the meta-analyses. Red: results for all SNPs. Blue: results after removing SNPs belonging to MM risk loci discovered in previous association studies (**Supplementary Fig. 1** and **Supplementary Table 1**). We observed minimal inflation of meta-analysis  $P$  values (genomic inflation factor  $\lambda=1.005$  and  $1.020$  for the two meta-analyses, respectively).

## Supplementary Figure 3

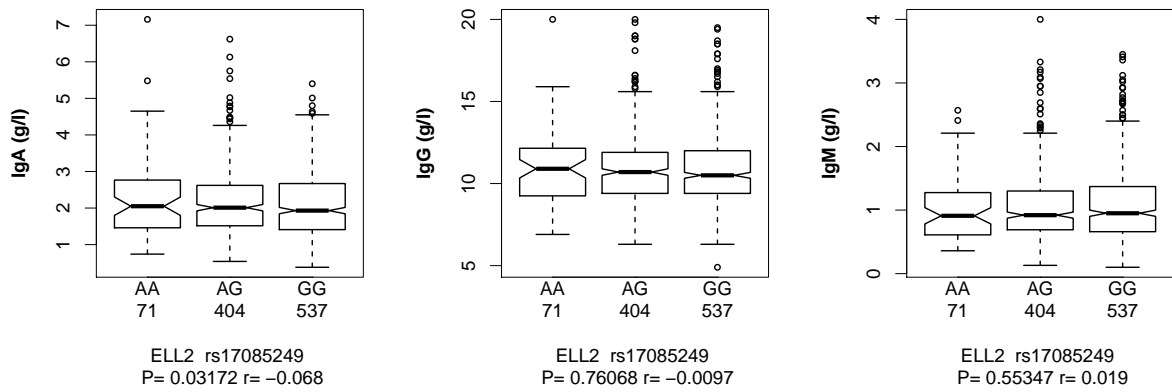

Blood concentrations of IgA, IgG and IgM values per genotype in 1,012 Swedish blood donors. These donors were genotyped previously for rs17085249, which is in tight linkage disequilibrium with the *ELL2* sentinel SNP rs56219066 ( $r^2=0.95$ ). Boxes indicate medians and the first and third quartiles. Whiskers indicate first and third quartiles  $\pm 1.5$  times the interquartile range or the minimum/maximum values. Notches indicate confidence intervals around the median. Pearson correlation  $P$  values indicated.

**Supplementary Table 1:** Association results for known MM risk loci

| Chr; Sentinel SNP     | Candidate gene(s)                | A1/A2 <sup>1</sup> | Population      | MM + MGUS    |              |                               | MM only      |              |                               | Prev. reported loci; LD values <sup>2</sup> |
|-----------------------|----------------------------------|--------------------|-----------------|--------------|--------------|-------------------------------|--------------|--------------|-------------------------------|---------------------------------------------|
|                       |                                  |                    |                 | RAF          | Beta         | <i>P</i>                      | RAF          | Beta         | <i>P</i>                      |                                             |
| 2p23.3<br>rs12986445  | <i>DTNB</i> ,<br><i>ASXL2</i>    | <u>A/T</u>         | Sweden/Norway   | 0.74         | 0.16         | 2.9 × 10 <sup>-4</sup>        | 0.74         | 0.16         | 2.9 × 10 <sup>-4</sup>        | rs6746082;<br>0.08/0.005                    |
|                       |                                  |                    | Iceland         | 0.75         | 0.199        | 5.1 × 10 <sup>-3</sup>        | 0.75         | 0.299        | 9.6 × 10 <sup>-4</sup>        |                                             |
|                       |                                  |                    | <b>Combined</b> | <b>0.74</b>  | <b>0.17</b>  | <b>5.3 × 10<sup>-6</sup></b>  | <b>0.74</b>  | <b>0.18</b>  | <b>2.6 × 10<sup>-6</sup></b>  |                                             |
| 3p22.1<br>rs73071352  | <i>ULK4</i>                      | <u>A/G</u>         | Sweden/Norway   | 0.14         | 0.23         | 1.9 × 10 <sup>-5</sup>        | 0.14         | 0.23         | 1.9 × 10 <sup>-5</sup>        | rs1052501;<br>1/0.81                        |
|                       |                                  |                    | Iceland         | 0.12         | 0.30         | 3.4 × 10 <sup>-4</sup>        | 0.12         | 0.28         | 7.6 × 10 <sup>-3</sup>        |                                             |
|                       |                                  |                    | <b>Combined</b> | <b>0.13</b>  | <b>0.25</b>  | <b>3.1 × 10<sup>-8</sup></b>  | <b>0.14</b>  | <b>0.24</b>  | <b>5.2 × 10<sup>-7</sup></b>  |                                             |
| 3q26.2<br>rs6793295   | <i>MYNN</i> ,<br><i>LRRC34</i>   | <u>I/C</u>         | Sweden/Norway   | 0.72         | 0.16         | 1.5 × 10 <sup>-4</sup>        | 0.72         | 0.16         | 1.5 × 10 <sup>-4</sup>        | rs10936599;<br>1/0.92                       |
|                       |                                  |                    | Iceland         | 0.78         | 0.18         | 1.6 × 10 <sup>-2</sup>        | 0.78         | 0.19         | 4.0 × 10 <sup>-2</sup>        |                                             |
|                       |                                  |                    | <b>Combined</b> | <b>0.74</b>  | <b>0.16</b>  | <b>7.1 × 10<sup>-6</sup></b>  | <b>0.73</b>  | <b>0.165</b> | <b>1.7 × 10<sup>-5</sup></b>  |                                             |
| 6p21.3<br>rs6919908   | <i>PSORS1C2</i> ,<br><i>HLA</i>  | <u>I/C</u>         | Sweden/Norway   | 0.21         | 0.26         | 1.2 × 10 <sup>-8</sup>        | 0.21         | 0.26         | 1.2 × 10 <sup>-8</sup>        | rs2285803;<br>0.94/0.57                     |
|                       |                                  |                    | Iceland         | 0.26         | 0.17         | 8.3 × 10 <sup>-3</sup>        | 0.26         | 0.22         | 8.2 × 10 <sup>-3</sup>        |                                             |
|                       |                                  |                    | <b>Combined</b> | <b>0.23</b>  | <b>0.23</b>  | <b>6.3 × 10<sup>-10</sup></b> | <b>0.23</b>  | <b>0.25</b>  | <b>3.8 × 10<sup>-10</sup></b> |                                             |
| 7p15.3<br>rs57104699  | <i>DNAH11</i> ,<br><i>CDCA7L</i> | <u>A/C</u>         | Sweden/Norway   | 0.66         | 0.19         | 1.4 × 10 <sup>-6</sup>        | 0.66         | 0.19         | 1.4 × 10 <sup>-6</sup>        | rs4487645;<br>0.96/0.92                     |
|                       |                                  |                    | Iceland         | 0.66         | 0.18         | 4.7 × 10 <sup>-3</sup>        | 0.66         | 0.22         | 7.3 × 10 <sup>-3</sup>        |                                             |
|                       |                                  |                    | <b>Combined</b> | <b>0.66</b>  | <b>0.19</b>  | <b>2.3 × 10<sup>-8</sup></b>  | <b>0.66</b>  | <b>0.20</b>  | <b>3.5 × 10<sup>-8</sup></b>  |                                             |
| 11q13<br>rs9344       | <i>CCND1</i>                     | <u>A/G</u>         | Sweden/Norway   | 0.53         | 0.147        | 1.7 × 10 <sup>-4</sup>        | 0.53         | 0.147        | 1.7 × 10 <sup>-4</sup>        | rs603965;<br>N/A                            |
|                       |                                  |                    | Iceland         | 0.53         | 0.105        | 7.8 × 10 <sup>-2</sup>        | 0.53         | 0.078        | 3.0 × 10 <sup>-1</sup>        |                                             |
|                       |                                  |                    | <b>Combined</b> | <b>0.53</b>  | <b>0.135</b> | <b>3.8 × 10<sup>-5</sup></b>  | <b>0.53</b>  | 0.132        | <b>1.3 × 10<sup>-4</sup></b>  |                                             |
| 17p11.2<br>rs57968458 | <i>TNFRSF13B</i>                 | <u>A/G</u>         | Sweden/Norway   | 0.10         | 0.35         | 1.2 × 10 <sup>-8</sup>        | 0.10         | 0.35         | 1.2 × 10 <sup>-8</sup>        | rs4273077;<br>0.85/0.39                     |
|                       |                                  |                    | Iceland         | 0.08         | 0.28         | 5.6 × 10 <sup>-3</sup>        | 0.08         | 0.40         | 1.2 × 10 <sup>-3</sup>        |                                             |
|                       |                                  |                    | <b>Combined</b> | <b>0.098</b> | <b>0.33</b>  | <b>2.8 × 10<sup>-10</sup></b> | <b>0.098</b> | <b>0.36</b>  | <b>5.7 × 10<sup>-11</sup></b> |                                             |
| 22q13.1<br>rs34101942 | <i>CBX7</i>                      | <u>G-/GA</u>       | Sweden/Norway   | 0.62         | 0.17         | 2.2 × 10 <sup>-5</sup>        | 0.62         | 0.17         | 2.2 × 10 <sup>-5</sup>        | rs877529;<br>N/A                            |
|                       |                                  |                    | Iceland         | 0.62         | 0.10         | 1.0 × 10 <sup>-1</sup>        | 0.62         | 0.23         | 2.7 × 10 <sup>-3</sup>        |                                             |
|                       |                                  |                    | <b>Combined</b> | <b>0.62</b>  | <b>0.15</b>  | <b>8.6 × 10<sup>-6</sup></b>  | <b>0.62</b>  | <b>0.18</b>  | <b>2.8 × 10<sup>-7</sup></b>  |                                             |

<sup>1</sup>Risk alleles underlined; <sup>2</sup>LD values are represented as  $D'/r^2$  values between sentinel SNPs from this study and the previously reported loci. Abbreviations: RAF, risk allele frequency. Logistic regression and meta-analysis *P* values indicated.

**Supplementary Table 2. Novel loci associating with MM or MM+MGUS at  $P < 5 \times 10^{-8}$**

| Populations                    | EAF   | MM                       |                                         | MM+MGUS                  |                                          |
|--------------------------------|-------|--------------------------|-----------------------------------------|--------------------------|------------------------------------------|
|                                |       | OR (95%CI)               | P value                                 | OR (95%CI)               | P value                                  |
| <b>ELL2 - rs56219066-T</b>     |       |                          |                                         |                          |                                          |
| Sweden/Norway                  | 0.732 | 1.20 (1.11-1.32)         | $3.8 \times 10^{-5}$                    | 1.20 (1.11-1.32)         | $3.8 \times 10^{-5}$                     |
| Iceland                        | 0.711 | 1.39 (1.17-1.64)         | $1.1 \times 10^{-4}$                    | 1.32 (1.15-1.51)         | $3.9 \times 10^{-5}$                     |
| <b>Combined</b>                |       | <b>1.23 (1.14-1.33)</b>  | <b><math>6.5 \times 10^{-8}</math></b>  | <b>1.23 (1.15-1.33)</b>  | <b><math>1.4 \times 10^{-8}</math></b>   |
| <b>TOM1 – rs138740-C</b>       |       |                          |                                         |                          |                                          |
| Sweden/Norway                  | 0.364 | 1.20 (1.11–1.30)         | $2.4 \times 10^{-6}$                    | 1.20 (1.11–1.30)         | $2.4 \times 10^{-6}$                     |
| Iceland                        | 0.415 | 1.26 (1.09-1.46)         | 0.0017                                  | 1.15 (1.03-1.30)         | 0.015                                    |
| <b>Combined</b>                |       | <b>1.22 (1.13-1.30)</b>  | <b><math>1.7 \times 10^{-8}</math></b>  | <b>1.19 (1.11-1.27)</b>  | <b><math>1.3 \times 10^{-7}</math></b>   |
| <b>ARHGAP26 – rs74735889-T</b> |       |                          |                                         |                          |                                          |
| Sweden/Norway                  | 0.003 | 4.41 (2.53-7.67)         | $1.6 \times 10^{-7}$                    | 4.41 (2.53-7.67)         | $1.6 \times 10^{-7}$                     |
| Iceland                        | 0.002 | 2.33 (0.79-6.87)         | 0.12                                    | 3.51 (0.79-6.87)         | $8.4 \times 10^{-4}$                     |
| <b>Combined</b>                |       | <b>3.85 (2.35-6.30)†</b> | <b><math>8.2 \times 10^{-8}</math>†</b> | <b>4.06 (2.61-6.33)†</b> | <b><math>5.9 \times 10^{-10}</math>†</b> |

Association results for *ELL2* rs56219066, *TOM1* rs138740, and *ARHGAP26* rs74735889 in the meta-analyses of the Swedish-Norwegian and Icelandic discovery samples. †By direct genotyping of the Swedish case and control samples the signal at 5q31 was no longer significant (OR=1.69;  $P=0.014$ ). Abbreviations: EAF, effect allele frequency; OR, odds ratio. Logistic regression and meta-analysis P values indicated.
